# Supplementary material for: Identification and validation of ubiquitination-related signature and subgroups in immune microenvironment of tuberculosis
Source: publisher site journal article supplement (doi:10.18632/aging.205198), 2023-11-09
Supplement: Supplementary file [file aging-v15i21-205198-supplementary-material-SD1.pdf]

**SUPPLEMENTARY FIGURE**

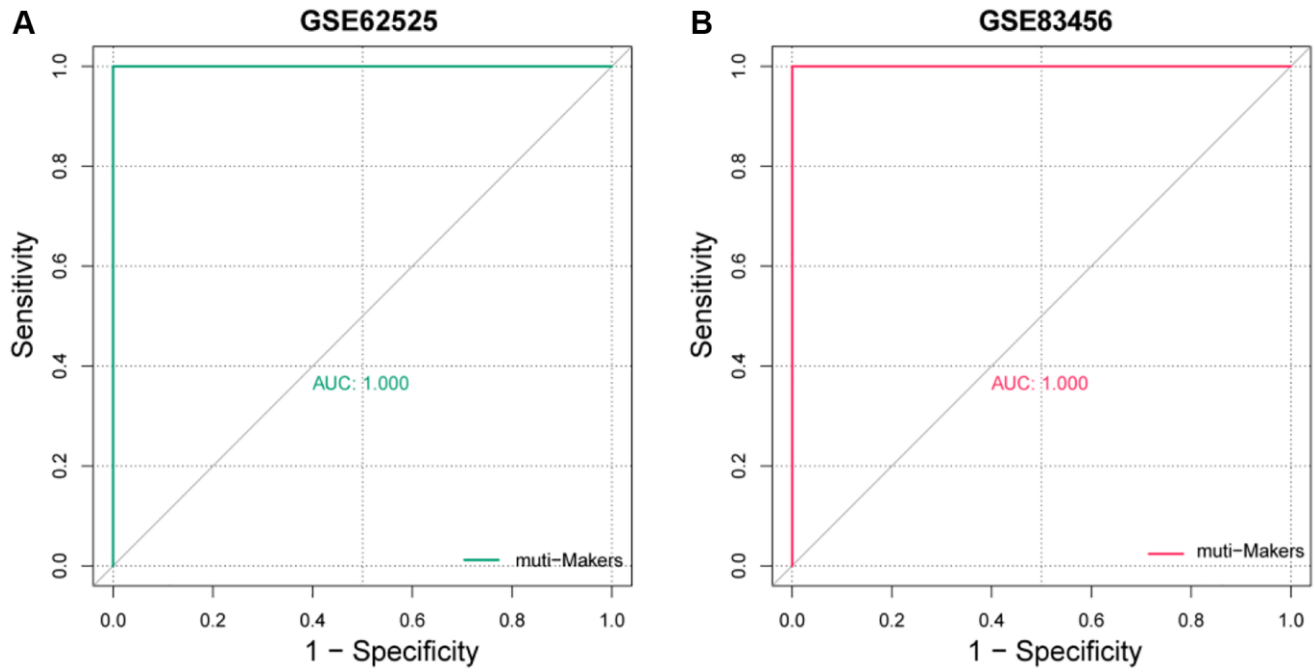

**Supplementary Figure 1.** ROC curve of Ub-signatures in GSE62525 (A) and GSE83456 (B) in TB diagnosis.
