# Supplementary material for: Identification and validation of ubiquitination-related signature and subgroups in immune microenvironment of tuberculosis
Source: publisher site journal article supplement (doi:10.18632/aging.205198), 2023-11-09
Supplement: Supplementary file [file aging-v15i21-205198-supplementary-material-SD2.pdf]

## SUPPLEMENTARY TABLE

**Supplementary Table 1. The markers in different cells type used in this study.**

| <b>Cells type</b> | <b>Markers</b>                   |
|-------------------|----------------------------------|
| T cells           | CD3D, CD3E, TRBC1                |
| NK cells          | CD3D, KLRD1, NKG7, KLRC1, FCGR3A |
| B cells           | MS4A1, CD79A, CD79B              |
| Neutrophils       | LYZ, CSF3R, CXCR2, FCGR3B        |
| monocytes         | LYZ, CD14, FCN1, FCGR3A, S100A9  |
| Dendritic cells   | FCER1A, IL3RA, CLEC4C, LILRB4    |
