# Supplementary material for: Identification and validation of ubiquitination-related signature and subgroups in immune microenvironment of tuberculosis
Source: Aging (Albany NY). 2023 Nov 9;15(21):12570–87. doi: 10.18632/aging.205198 (PMC10683621; doi:10.18632/aging.205198)
Supplement: Supplementary Table 2 [file aging-15-205198-s003.xlsx]

## Sheet: Sheet1
Supplementary Table 2. Ubiquitination-related genes used in this study.
gene	Ubiquitination-related genes
A1S9T	E1
AOS1	E1
APG7L	E1
APPBP1	E1
ATG7	E1
HPP1	E1
HRIHFB2115	E1
MOP4	E1
NAE1	E1
SAE1	E1
SAE2	E1
SUA1	E1
UBA1	E1
UBA2	E1
UBA3	E1
UBA5	E1
UBA6	E1
UBA7	E1
UBE1	E1
UBE1C	E1
UBE1DC1	E1
UBE1L	E1
UBE1L2	E1
UBE2	E1
UBLE1A	E1
UBLE1B	E1
APG10L	E2
APG3	E2
APG3L	E2
ATG10	E2
ATG3	E2
BIRC6	E2
BLU	E2
CDC34	E2
CDC34B	E2
CGI-126	E2
CGI-76	E2
CROC1	E2
E2EPF	E2
hCG_1789360	E2
hCG_2044781	E2
HIP2	E2
HOYS7	E2
HSPC150	E2
HSPC153	E2
HSPC155	E2
HSPC205	E2
KIAA1289	E2
KIAA1734	E2
LIG	E2
MMS2	E2
NCE2	E2
NCUBE1	E2
NCUBE2	E2
NICE5	E2
OK/SW-cl.73	E2
P/OKcl.19	E2
PIG50	E2
PP12616	E2
PRO3094	E2
PUBC1	E2
RAD6A	E2
RAD6B	E2
RP11-463D19.2	E2
SFT	E2
TMEM189-UBE2V1	E2
TSG101	E2
UBC12	E2
UBC16	E2
UBC3B	E2
UBC4	E2
UBC5A	E2
UBC5B	E2
UBC5C	E2
UBC9	E2
UBCE4	E2
UBCE7	E2
UBCE9	E2
UBCH10	E2
UBCH3	E2
UBCH4	E2
UBCH5	E2
UBCH5A	E2
UBCH5B	E2
UBCH5C	E2
UBCH5D	E2
UBCH6	E2
UBCH7	E2
UBCH8	E2
UBCH8	E2
UBCH9	E2
UBE2A	E2
UBE2B	E2
UBE2C	E2
UBE2D1	E2
UBE2D2	E2
UBE2D3	E2
UBE2D4	E2
UBE2E1	E2
UBE2E2	E2
UBE2E3	E2
UBE2F	E2
UBE2G	E2
UBE2G1	E2
UBE2G2	E2
UBE2H	E2
UBE2I	E2
UBE2J1	E2
UBE2J2	E2
UBE2K	E2
UBE2L3	E2
UBE2L5P	E2
UBE2L6	E2
UBE2M	E2
UBE2N	E2
UBE2NL	E2
UBE2O	E2
UBE2Q	E2
UBE2Q1	E2
UBE2Q2	E2
UBE2R1	E2
UBE2R2	E2
UBE2S	E2
UBE2T	E2
UBE2U	E2
UBE2V	E2
UBE2V1	E2
UBE2V2	E2
UBE2W	E2
UBE2Z	E2
UEV1	E2
UEV2	E2
UFC1	E2
A20	E3
AAMP	E3
ABTB1	E3
ABTB2	E3
AC026348.1	E3
ACF1	E3
AD-006	E3
AHCTF1	E3
AHI1	E3
AHR	E3
AIK	E3
AIRE	E3
AIRK1	E3
ALL1	E3
ALO17	E3
ALR	E3
ALS2CR16	E3
ALS2CR17	E3
AMBRA1	E3
AMFR	E3
ANAPC1	E3
ANAPC10	E3
ANAPC11	E3
ANAPC11	E3
ANAPC12	E3
ANAPC13	E3
ANAPC2	E3
ANAPC2	E3
ANAPC3	E3
ANAPC4	E3
ANAPC5	E3
ANAPC6	E3
ANAPC7	E3
ANAPC8	E3
AND1	E3
ANKIB1	E3
APAF1	E3
APC10	E3
APC2	E3
APC2	E3
APC4	E3
APC5	E3
APC7	E3
APECED	E3
APG16L	E3
APG5L	E3
API1	E3
API2	E3
API3	E3
APM1	E3
ARA160	E3
ARA267	E3
ARA3	E3
ARA54	E3
ARC41	E3
ARD1	E3
AREL1	E3
ARFD1	E3
ARI	E3
ARI2	E3
ARIH1	E3
ARIH2	E3
ARK1	E3
ARMC4	E3
ARNIP	E3
ARNT	E3
ARPC1A	E3
ARPC1B	E3
ASB1	E3
ASB11	E3
ASB12	E3
ASB14	E3
ASB15	E3
ASB2	E3
ASB3	E3
ASB4	E3
ASB6	E3
ASB7	E3
ASB8	E3
ASB9	E3
ASP	E3
ATG16L1	E3
ATG16L2	E3
ATG5	E3
AURA	E3
AURKA	E3
AXOT	E3
AYK1	E3
BACH1	E3
BACH2	E3
BACURD1	E3
BACURD2	E3
BAF45A	E3
BAF45B	E3
BAF45C	E3
BAP1	E3
BAR	E3
BARD1	E3
BAZ1A	E3
BAZ1B	E3
BAZF	E3
BBAP	E3
BCL5	E3
BCL6	E3
BCL6B	E3
BCL8B	E3
BCRG2	E3
BDPL	E3
BERP	E3
BFAR	E3
BHC80	E3
BHLHE2	E3
BHLHE76	E3
BIG3	E3
BING1	E3
BIRC2	E3
BIRC3	E3
BIRC4	E3
BIRC7	E3
BKLHD1	E3
BKLHD2	E3
BKLHD3	E3
BKLHD5	E3
BKLHD6	E3
BM-006	E3
BM-023	E3
BMI1	E3
BOP1	E3
BOZF1	E3
BPOZ	E3
BPTF	E3
BRAP	E3
BRCA1	E3
BRE1A	E3
BRE1B	E3
BRWD1	E3
BRWD2	E3
BRWD3	E3
BTAK	E3
BTBD1	E3
BTBD11	E3
BTBD12	E3
BTBD14A	E3
BTBD14B	E3
BTBD18	E3
BTBD19	E3
BTBD2	E3
BTBD3	E3
BTBD4	E3
BTBD5	E3
BTBD6	E3
BTBD7	E3
BTBD8	E3
BTBD9	E3
BTKI	E3
BTRC	E3
BTRC	E3
BTRCP	E3
BTRCP	E3
BTRCP2	E3
BTRCP2	E3
BUB3	E3
BZF1	E3
C10orf64	E3
C10orf90	E3
C12orf51	E3
C13orf17	E3
C14orf150	E3
C14orf164	E3
C14orf18	E3
C14orf4	E3
C14orf51	E3
C15orf1	E3
C16orf21	E3
C16orf44	E3
C17orf1	E3
C17orf1A	E3
C17orf27	E3
C17orf36	E3
C17orf78	E3
C19orf14	E3
C19orf72	E3
C1orf164	E3
C1orf166	E3
C1orf37	E3
C20orf158	E3
C20orf163	E3
C20orf18	E3
C20orf188	E3
C21orf10	E3
C21orf107	E3
C21orf98	E3
C2orf37	E3
C3IP1	E3
C4orf30	E3
C6orf13	E3
C6orf13	E3
C6orf133	E3
C6orf133	E3
C6orf133	E3
C6orf157	E3
C6orf172	E3
C6orf2	E3
C6orf4	E3
C6orf5	E3
C6orf6	E3
C8	E3
C8orf36	E3
C8orf36	E3
C8orfK36	E3
C9orf112	E3
C9orf17	E3
CADPS2	E3
CAF1A	E3
CAF1P60	E3
CAP1	E3
CAP35	E3
CAPS2	E3
CART1	E3
CBL	E3
CBL2	E3
CBL3	E3
CBLB	E3
CBLC	E3
CBLL1	E3
CBP	E3
CBX4	E3
CCIN	E3
CCNB1IP1	E3
CCNF	E3
CCR11	E3
CCR6	E3
CCRL2	E3
CDABP0061	E3
CDC16	E3
CDC20	E3
CDC20	E3
CDC20B	E3
CDC23	E3
CDC26	E3
CDC27	E3
CDC40	E3
CDCA3	E3
CDH1	E3
CDH1	E3
CDRT1	E3
CDRT1	E3
CDT2	E3
CDW1	E3
CDW2	E3
CEB1	E3
CEBP1	E3
CENP-30	E3
CENP-33	E3
CENP-35	E3
CERD4	E3
CFAP251	E3
CFAP44	E3
CFAP44	E3
CFAP52	E3
CFAP57	E3
CGI-123	E3
CGI-25	E3
CGI-48	E3
CGI-50	E3
CGI-73	E3
CH507-9B2.5	E3
CHAF1B	E3
CHD3	E3
CHD4	E3
CHD5	E3
CHFR	E3
CHIMP	E3
CHIP	E3
CHS	E3
CHS1	E3
CIAO1	E3
CIS2	E3
CIS3	E3
CIS4	E3
CIS6	E3
CISH	E3
CISH5	E3
CISH6	E3
CKN1	E3
CKRX	E3
CLLD7	E3
CNOT4	E3
COMMD3-BMI1	E3
COP1	E3
COP1	E3
COPA	E3
COPB2	E3
CORO1	E3
CORO1A	E3
CORO1B	E3
CORO1C	E3
CORO2A	E3
CORO2B	E3
CORO6	E3
CORO7	E3
CORO7	E3
CORO7	E3
CORO7-PAM16	E3
CPNE1	E3
CRAF1	E3
CRAM	E3
CRBN	E3
CREBBP	E3
CRN2	E3
CRNN4	E3
CSA	E3
CSTF1	E3
CUL1	E3
CUL2	E3
CUL3	E3
CUL4A	E3
CUL4B	E3
CUL5	E3
CUL7	E3
CUL9	E3
CUL9	E3
CXXC2	E3
CXXC2	E3
CXXC7	E3
CXXC8	E3
D0S1430E	E3
D17S978E	E3
D3S1231E	E3
DATF1	E3
DAW1	E3
DBC2	E3
DC10	E3
DC28	E3
DCAF1	E3
DCAF10	E3
DCAF11	E3
DCAF12	E3
DCAF12L1	E3
DCAF12L2	E3
DCAF13	E3
DCAF15	E3
DCAF16	E3
DCAF17	E3
DCAF2	E3
DCAF4	E3
DCAF4L2	E3
DCAF5	E3
DCAF6	E3
DCAF7	E3
DCAF8	E3
DCAF8	E3
DCAF8L1	E3
DCAF8L2	E3
DCRR1	E3
DCUN1D1	E3
DCUN1D2	E3
DCUN1D3	E3
DCUN1D5	E3
DCUN1L1	E3
DCUN1L2	E3
DDB1	E3
DDB2	E3
DDXBP1	E3
DENND3	E3
DGCR1	E3
DIDO1	E3
DING	E3
DIP1	E3
DLG4	E3
DM9	E3
DMWD	E3
DMXL1	E3
DMXL2	E3
DNAI1	E3
DNAI2	E3
DNAPTP2	E3
DNCI1	E3
DNCI2	E3
DNCIC1	E3
DNCIC2	E3
DPF1	E3
DPF2	E3
DPF3	E3
DPH7	E3
DPZF	E3
DRE1	E3
DTL	E3
DTX1	E3
DTX2	E3
DTX3	E3
DTX3L	E3
DTX4	E3
DXS1272E	E3
DYNC1I1	E3
DYNC1I2	E3
DZIP3	E3
E4.5	E3
E4F	E3
E4F1	E3
E6AP	E3
EAP1	E3
EBBP	E3
EDD	E3
EDD	E3
EDD1	E3
EDD1	E3
EDP1	E3
EED	E3
EFCAB8	E3
EFP	E3
EFP	E3
EHB3	E3
EIF3I	E3
EIF3S2	E3
ELOA	E3
ELOA	E3
ELOB	E3
ELOC	E3
ELP2	E3
ELYS	E3
EMAP1	E3
EMAP2	E3
EMAPL	E3
EMAPL1	E3
EMAPL2	E3
EMC19	E3
EML1	E3
EML2	E3
EML3	E3
EML4	E3
EML5	E3
EML5L	E3
EML6	E3
ENC1	E3
ENC2	E3
EP300	E3
EPM2B	E3
EPM2B	E3
EPVE6AP	E3
ERCC8	E3
F1AA	E3
FAC1	E3
FALZ	E3
FAM53C	E3
FAN	E3
FANCL	E3
FATS	E3
FBG2	E3
FBG3	E3
FBG4	E3
FBG5	E3
FBH1	E3
FBI1	E3
FBL10	E3
FBL10	E3
FBL12	E3
FBL14	E3
FBL17	E3
FBL19	E3
FBL19	E3
FBL2	E3
FBL2	E3
FBL21	E3
FBL3	E3
FBL3	E3
FBL3A	E3
FBL4	E3
FBL4	E3
FBL5	E3
FBL5	E3
FBL6	E3
FBL6	E3
FBL7	E3
FBL7	E3
FBS	E3
FBS2	E3
FBW1A	E3
FBW1A	E3
FBW1B	E3
FBW1B	E3
FBW2	E3
FBW2	E3
FBW4	E3
FBW4	E3
FBW5	E3
FBW5	E3
FBW6	E3
FBW6	E3
FBW7	E3
FBW7	E3
FBW8	E3
FBW8	E3
FBW9	E3
FBX1	E3
FBX10	E3
FBX11	E3
FBX13	E3
FBX14	E3
FBX15	E3
FBX17	E3
FBX18	E3
FBX2	E3
FBX22	E3
FBX25	E3
FBX26	E3
FBX27	E3
FBX29	E3
FBX29	E3
FBX3	E3
FBX30	E3
FBX30	E3
FBX30	E3
FBX30	E3
FBX31	E3
FBX33	E3
FBX4	E3
FBX40	E3
FBX42	E3
FBX44	E3
FBX45	E3
FBX48	E3
FBX6	E3
FBX6A	E3
FBX7	E3
FBX8	E3
FBX9	E3
FBXL1	E3
FBXL10	E3
FBXL10	E3
FBXL11	E3
FBXL12	E3
FBXL14	E3
FBXL15	E3
FBXL17	E3
FBXL19	E3
FBXL19	E3
FBXL2	E3
FBXL20	E3
FBXL21	E3
FBXL3	E3
FBXL3A	E3
FBXL3B	E3
FBXL3P	E3
FBXL4	E3
FBXL5	E3
FBXL6	E3
FBXL7	E3
FBXL8	E3
FBXO1	E3
FBXO10	E3
FBXO11	E3
FBXO13	E3
FBXO15	E3
FBXO17	E3
FBXO18	E3
FBXO2	E3
FBXO22	E3
FBXO25	E3
FBXO26	E3
FBXO27	E3
FBXO28	E3
FBXO29	E3
FBXO29	E3
FBXO3	E3
FBXO30	E3
FBXO31	E3
FBXO32	E3
FBXO33	E3
FBXO37	E3
FBXO4	E3
FBXO40	E3
FBXO42	E3
FBXO44	E3
FBXO45	E3
FBXO48	E3
FBXO6	E3
FBXO6A	E3
FBXO7	E3
FBXO8	E3
FBXO9	E3
FBXW10	E3
FBXW10	E3
FBXW11	E3
FBXW11	E3
FBXW1A	E3
FBXW1A	E3
FBXW1B	E3
FBXW1B	E3
FBXW2	E3
FBXW2	E3
FBXW4	E3
FBXW4	E3
FBXW5	E3
FBXW5	E3
FBXW6	E3
FBXW6	E3
FBXW7	E3
FBXW7	E3
FBXW8	E3
FBXW8	E3
FBXW9	E3
FEM1B	E3
FEM1C	E3
FIGC	E3
FKSG1	E3
FKSG11	E3
FKSG33	E3
FKSG86	E3
FLARA3	E3
FLR1	E3
FLRF	E3
FLRF	E3
FP1477	E3
FP977	E3
FRBZ1	E3
FUS	E3
FWD2	E3
FWD2	E3
FXY	E3
FXY2	E3
FYCO1	E3
FYR	E3
FYR	E3
FZR	E3
FZR	E3
FZR1	E3
FZR1	E3
G16	E3
G16	E3
G18	E3
G2E3	E3
G6VTS76519	E3
GAN	E3
GAN1	E3
GC109	E3
GC109	E3
GEMIN5	E3
GERP	E3
GERP	E3
GIDE	E3
GL	E3
GL014	E3
GNB1	E3
GNB1L	E3
GNB2	E3
GNB2L1	E3
GNB3	E3
GNB4	E3
GNB5	E3
GNIP	E3
GNIP	E3
GOA	E3
GOA	E3
GPR75-ASB3	E3
GRCC8	E3
GRCC9	E3
GRG4	E3
GRWD	E3
GRWD1	E3
GS2NA	E3
GTF2H2C	E3
GTF2H2C_2	E3
GTF2H2D	E3
GTF3C1	E3
GTF3C2	E3
GY2	E3
GZF1	E3
H10BH	E3
H326	E3
H7AP1	E3
H7AP1	E3
HACE1	E3
HAKAI	E3
HALR	E3
HAN11	E3
hCG_16292	E3
hCG_1811661	E3
hCG_20873	E3
HCR	E3
HDAC4	E3
HDNB1	E3
HECTD1	E3
HECTD2	E3
HECTD3	E3
HECTD4	E3
HECW1	E3
HECW2	E3
HEI10	E3
HERC1	E3
HERC1	E3
HERC2	E3
HERC2	E3
HERC3	E3
HERC4	E3
HERC5	E3
HERC6	E3
HIC1	E3
HIC2	E3
HIP116A	E3
HIPI3	E3
HIR	E3
HIRA	E3
HKMT1069	E3
HKR3	E3
HLC7	E3
HLS5	E3
HLS5	E3
HLTF	E3
HOIP	E3
HOX2F	E3
HOXB4	E3
HPVE6A	E3
HRD1	E3
HREP	E3
HRG22	E3
HRIHFB2007	E3
HRIHFB2038	E3
HRX	E3
HRX2	E3
HSD15	E3
HSD34	E3
HSD-34	E3
HSD4	E3
HSD-4	E3
HSPC019	E3
HSPC049	E3
HSPC064	E3
HSPC068	E3
HSPC087	E3
HSPC214	E3
HSPC214	E3
HSPC216	E3
HSPC238	E3
HSPC240	E3
HSPC272	E3
HSPC301	E3
HSPC317	E3
HSPC333	E3
HSPC337	E3
HT005	E3
HT2A	E3
HTRX	E3
HUGL	E3
HUGL1	E3
HUMSIAH	E3
HUSSY-07	E3
HUSSY-27	E3
HUWE1	E3
HY	E3
HYA	E3
HYD	E3
HYD	E3
HZFW	E3
HZFW	E3
IAK1	E3
IAP3	E3
IBRDC1	E3
IBRDC2	E3
IBRDC3	E3
IBTK	E3
ICBP90	E3
IDOL	E3
IFP1	E3
IFP1	E3
IFT122	E3
IFT172	E3
IFT80	E3
ING1	E3
ING1L	E3
ING2	E3
ING3	E3
ING4	E3
ING5	E3
INRF2	E3
INTS12	E3
IPP	E3
IQWD1	E3
IR10	E3
IRA1	E3
IRA1	E3
IRF	E3
IRF2BP1	E3
IRF2BPL	E3
ITCH	E3
IVNS1ABP	E3
JADE1	E3
JARID1A	E3
JARID1B	E3
JARID1C	E3
JARID1D	E3
JFK	E3
JFP7	E3
JHDM1A	E3
JHDM1B	E3
JHDM1B	E3
JHDM1D	E3
JM5	E3
JNKBP1	E3
KAISO	E3
KAP1	E3
KAP1	E3
KAT2B	E3
KAT6A	E3
KATNB1	E3
KBTBD1	E3
KBTBD10	E3
KBTBD12	E3
KBTBD13	E3
KBTBD2	E3
KBTBD3	E3
KBTBD4	E3
KBTBD5	E3
KBTBD6	E3
KBTBD7	E3
KBTBD8	E3
KBTBD9	E3
KCMF1	E3
KCTD10	E3
KCTD11	E3
KCTD13	E3
KCTD17	E3
KCTD2	E3
KCTD21	E3
KCTD3	E3
KCTD3	E3
KCTD5	E3
KCTD6	E3
KCTD7	E3
KCTD9	E3
KDM2A	E3
KDM2B	E3
KDM2B	E3
KDM5A	E3
KDM5B	E3
KDM5C	E3
KDM5D	E3
KDM7	E3
KDM7A	E3
KEAP1	E3
KIAA0007	E3
KIAA0010	E3
KIAA0011	E3
KIAA0032	E3
KIAA0045	E3
KIAA0073	E3
KIAA0076	E3
KIAA0093	E3
KIAA0124	E3
KIAA0126	E3
KIAA0132	E3
KIAA0161	E3
KIAA0176	E3
KIAA0199	E3
KIAA0221	E3
KIAA0234	E3
KIAA0262	E3
KIAA0282	E3
KIAA0288	E3
KIAA0304	E3
KIAA0312	E3
KIAA0317	E3
KIAA0322	E3
KIAA0333	E3
KIAA0349	E3
KIAA0349	E3
KIAA0349	E3
KIAA0352	E3
KIAA0354	E3
KIAA0396	E3
KIAA0413	E3
KIAA0414	E3
KIAA0438	E3
KIAA0439	E3
KIAA0441	E3
KIAA0444	E3
KIAA0449	E3
KIAA0462	E3
KIAA0469	E3
KIAA0478	E3
KIAA0483	E3
KIAA0517	E3
KIAA0540	E3
KIAA0541	E3
KIAA0544	E3
KIAA0596	E3
KIAA0597	E3
KIAA0614	E3
KIAA0617	E3
KIAA0646	E3
KIAA0661	E3
KIAA0662	E3
KIAA0671	E3
KIAA0675	E3
KIAA0684	E3
KIAA0695	E3
KIAA0696	E3
KIAA0696	E3
KIAA0708	E3
KIAA0708	E3
KIAA0714	E3
KIAA0717	E3
KIAA0740	E3
KIAA0776	E3
KIAA0795	E3
KIAA0800	E3
KIAA0840	E3
KIAA0850	E3
KIAA0856	E3
KIAA0860	E3
KIAA0860	E3
KIAA0878	E3
KIAA0893	E3
KIAA0896	E3
KIAA0896	E3
KIAA0898	E3
KIAA0916	E3
KIAA0925	E3
KIAA0937	E3
KIAA0952	E3
KIAA0982	E3
KIAA0993	E3
KIAA0997	E3
KIAA10	E3
KIAA1004	E3
KIAA1006	E3
KIAA1020	E3
KIAA1037	E3
KIAA1090	E3
KIAA1095	E3
KIAA1098	E3
KIAA1098	E3
KIAA1100	E3
KIAA1111	E3
KIAA1113	E3
KIAA1113	E3
KIAA1129	E3
KIAA1131	E3
KIAA1133	E3
KIAA1146	E3
KIAA1179	E3
KIAA1190	E3
KIAA1195	E3
KIAA1214	E3
KIAA1224	E3
KIAA1227	E3
KIAA1242	E3
KIAA1242	E3
KIAA1261	E3
KIAA1301	E3
KIAA1303	E3
KIAA1307	E3
KIAA1309	E3
KIAA1320	E3
KIAA1323	E3
KIAA1332	E3
KIAA1333	E3
KIAA1340	E3
KIAA1351	E3
KIAA1354	E3
KIAA1374	E3
KIAA1378	E3
KIAA1384	E3
KIAA1386	E3
KIAA1399	E3
KIAA1406	E3
KIAA1406	E3
KIAA1417	E3
KIAA1435	E3
KIAA1449	E3
KIAA1475	E3
KIAA1483	E3
KIAA1489	E3
KIAA1490	E3
KIAA1494	E3
KIAA1506	E3
KIAA1525	E3
KIAA1528	E3
KIAA1538	E3
KIAA1541	E3
KIAA1542	E3
KIAA1542	E3
KIAA1544	E3
KIAA1547	E3
KIAA1554	E3
KIAA1578	E3
KIAA1585	E3
KIAA1591	E3
KIAA1593	E3
KIAA1607	E3
KIAA1618	E3
KIAA1625	E3
KIAA1645	E3
KIAA1677	E3
KIAA1687	E3
KIAA1696	E3
KIAA1708	E3
KIAA1718	E3
KIAA1736	E3
KIAA1784	E3
KIAA1785	E3
KIAA1807	E3
KIAA1810	E3
KIAA1824	E3
KIAA1842	E3
KIAA1865	E3
KIAA1875	E3
KIAA1880	E3
KIAA1886	E3
KIAA1892	E3
KIAA1900	E3
KIAA1917	E3
KIAA1921	E3
KIAA1923	E3
KIAA1942	E3
KIAA1972	E3
KIAA1987	E3
KIAA1999	E3
KIAA2023	E3
KIAA2025	E3
KIAP	E3
KIF2	E3
KIF21A	E3
KIF21B	E3
KLEIP	E3
KLHDC5	E3
KLHDC6	E3
KLHL	E3
KLHL1	E3
KLHL10	E3
KLHL11	E3
KLHL12	E3
KLHL13	E3
KLHL14	E3
KLHL15	E3
KLHL16	E3
KLHL17	E3
KLHL18	E3
KLHL19	E3
KLHL2	E3
KLHL20	E3
KLHL21	E3
KLHL22	E3
KLHL23	E3
KLHL24	E3
KLHL25	E3
KLHL26	E3
KLHL27	E3
KLHL28	E3
KLHL29	E3
KLHL3	E3
KLHL30	E3
KLHL31	E3
KLHL32	E3
KLHL33	E3
KLHL34	E3
KLHL35	E3
KLHL36	E3
KLHL37	E3
KLHL38	E3
KLHL4	E3
KLHL40	E3
KLHL41	E3
KLHL42	E3
KLHL5	E3
KLHL6	E3
KLHL7	E3
KLHL8	E3
KLHL9	E3
KMT2A	E3
KMT2B	E3
KMT2C	E3
KMT2D	E3
KMT3B	E3
KPC1	E3
KRP1	E3
KUP	E3
L13	E3
L2DTL	E3
LAZ3	E3
LDB2	E3
LEU5	E3
LIN41	E3
LINCR	E3
LIS1	E3
LIVIN	E3
LLGL1	E3
LLGL2	E3
LLGL3	E3
LLGL4	E3
LNX	E3
LNX1	E3
LNX3	E3
LNX4	E3
LOC102724159	E3
LONRF1	E3
LONRF1	E3
LONRF2	E3
LONRF3	E3
LONRF3	E3
LP2254	E3
LRF	E3
LRR1	E3
LRRC41	E3
LRSAM1	E3
LRWD1	E3
LTN1	E3
LUN	E3
LYST	E3
LYST2	E3
LZTR1	E3
MALT1	E3
MAP3K1	E3
MAPKBP1	E3
MAPKKK1	E3
MAPL	E3
MARCH1	E3
MARCH10	E3
MARCH11	E3
MARCH2	E3
MARCH2	E3
MARCH3	E3
MARCH4	E3
MARCH5	E3
MARCH5	E3
MARCH6	E3
MARCH7	E3
MARCH8	E3
MARCH9	E3
MAT1	E3
MAWD	E3
MBLR	E3
MDCR	E3
MDM2	E3
MDM4	E3
MDMX	E3
MDS	E3
MED16	E3
MED8	E3
MEKK	E3
MEKK1	E3
MEL18	E3
MEP50	E3
MG53	E3
MG53	E3
MGRN1	E3
MIB1	E3
MIB2	E3
MID1	E3
MID2	E3
MIHB	E3
MIHC	E3
MIOS	E3
MIP2	E3
MIR	E3
MIZ1	E3
MKRN1	E3
MLIAP	E3
MLL	E3
MLL1	E3
MLL2	E3
MLL2	E3
MLL3	E3
MLL4	E3
MLL4	E3
MLN62	E3
MLST8	E3
MLT	E3
MMS21	E3
MMS21	E3
MMSET	E3
MNAB	E3
MNAT1	E3
MOP6	E3
MORG1	E3
MOZ	E3
MPHOSPH7	E3
MPP7	E3
MSL2	E3
MSL2L1	E3
MSTP028	E3
MSTP048	E3
MSTP050	E3
MSTP055	E3
MSTP059	E3
MSTP059	E3
MSTP108	E3
MTF2	E3
MUF1	E3
MUL	E3
MUL1	E3
MULAN	E3
MURF	E3
MURF1	E3
MURF2	E3
MURF3	E3
My036	E3
My038	E3
My038	E3
My039	E3
MYCBP2	E3
MYL	E3
MYLIP	E3
MYNN	E3
MYST3	E3
MYSTR	E3
NAC1	E3
NAC2	E3
NACC1	E3
NACC2	E3
NAP4	E3
NARF	E3
NBEA	E3
NBEAL1	E3
NBEAL2	E3
Nbla00127	E3
Nbla10071	E3
NEDD1	E3
NEDD4	E3
NEDD4-1	E3
NEDD4L	E3
NEDL1	E3
NEDL2	E3
NEDL3	E3
NEUD4	E3
NEURL1B	E3
NEURL2	E3
NEURL3	E3
NEURL3	E3
NFX1	E3
NFX2	E3
NG2	E3
NG2	E3
NHLRC1	E3
NHLRC1	E3
NIN283	E3
NIPA	E3
NIRF	E3
NIRF	E3
NKLAM	E3
NLBP	E3
NLE1	E3
NMP200	E3
NMP200	E3
NOL10	E3
NOSIP	E3
NOT4	E3
NP95	E3
NR1C1	E3
NR1C3	E3
NRDP1	E3
NRDP1	E3
NRPB	E3
NS1	E3
NS1BP	E3
NS5ATP8	E3
NSA1	E3
NSD1	E3
NSD2	E3
NSD3	E3
NSMAF	E3
NSMCE1	E3
NSMCE2	E3
NSMCE2	E3
NSPC1	E3
NUP358	E3
NUP37	E3
NUP43	E3
NUP62	E3
NWD1	E3
OCP2	E3
OK/SW-cl.74	E3
ORCA	E3
OSTM1	E3
OSZF	E3
OTUD7C	E3
P2PR	E3
P2PR	E3
P300	E3
P53RFP	E3
PAAF1	E3
PACT	E3
PACT	E3
PAF1	E3
PAF3	E3
PAF65B	E3
PAFAH1B1	E3
PAFAHA	E3
PAK1IP1	E3
PAM	E3
PARC	E3
PARC	E3
PARK2	E3
PATZ	E3
PATZ1	E3
PCAF	E3
PCCX2	E3
PCCX2	E3
PCGF1	E3
PCGF2	E3
PCGF3	E3
PCGF4	E3
PCGF5	E3
PCGF6	E3
PCL1	E3
PCL2	E3
PDIP1	E3
PDLIM2	E3
PDZRN2	E3
PDZRN3	E3
PDZRN4	E3
PELI1	E3
PELI2	E3
PELI3	E3
PEX10	E3
PEX12	E3
PEX2	E3
PEX7	E3
PF20	E3
PHF1	E3
PHF1	E3
PHF10	E3
PHF14	E3
PHF17	E3
PHF2	E3
PHF21A	E3
PHF22	E3
PHF8	E3
PHF9	E3
PHIP	E3
PHRF1	E3
PHRF1	E3
PHRF1	E3
PHRF1	E3
PIAS1	E3
PIAS2	E3
PIAS3	E3
PIAS4	E3
PIASG	E3
PIASX	E3
PIG10	E3
PIG21	E3
PIG53	E3
PIK3R4	E3
PIP1	E3
PIRH2	E3
PJA1	E3
PJA2	E3
PLAA	E3
PLAP	E3
PLRG1	E3
PLU1	E3
PLZF	E3
PML	E3
PMP3	E3
PMP35	E3
POB1	E3
POC1A	E3
POC1B	E3
POLDIP1	E3
POSH	E3
POSH2	E3
PP1009	E3
PP1131	E3
PP14212	E3
PP1782	E3
PP1881	E3
PP203	E3
PP203	E3
PP2259	E3
PP2386	E3
PP3971	E3
PP3971	E3
PP5242	E3
PP6345	E3
PP6832	E3
PP7759	E3
PP8675	E3
PPAR	E3
PPARA	E3
PPARG	E3
PPIL2	E3
PPIL5	E3
PPP1R39	E3
PPP2R2A	E3
PPP2R2B	E3
PPP2R2C	E3
PPP2R2D	E3
PPWD1	E3
PQWD	E3
PREB	E3
PRISM	E3
PRKN	E3
PRMT11	E3
PRMT9	E3
PRO0852	E3
PRO2389	E3
PRP17	E3
PRP19	E3
PRP19	E3
PRP4	E3
PRP8BP	E3
PRPF17	E3
PRPF19	E3
PRPF19	E3
PRPF4	E3
PSEC0006	E3
PSEC0227	E3
PTD016	E3
PTS2R	E3
PWP1	E3
PWP2	E3
PWP2H	E3
PXMP3	E3
RAB40A	E3
RAB40AL	E3
RAB40B	E3
RAB40C	E3
RABEX5	E3
RABGEF1	E3
RACK1	E3
RAD18	E3
RAE1	E3
RAG1	E3
RAI17	E3
RAMP	E3
RANBP2	E3
RAPTOR	E3
RARL	E3
RASD2	E3
RASL8C	E3
RBAF600	E3
RBAP46	E3
RBAP48	E3
RBB	E3
RBBP2	E3
RBBP2H1	E3
RBBP4	E3
RBBP5	E3
RBBP6	E3
RBBP6	E3
RBBP7	E3
RBCC	E3
RBCC	E3
RBCC728	E3
RBCK1	E3
RBP2	E3
RBQ1	E3
RBQ1	E3
RBQ3	E3
RBX1	E3
RBX2	E3
RC3H1	E3
RC3H2	E3
RCAD	E3
RCBTB1	E3
RCBTB2	E3
RCHY1	E3
REN	E3
RENT1	E3
RES4-26	E3
RFB30	E3
RFB30	E3
RFFL	E3
RFG7	E3
RFG7	E3
RFP	E3
RFP2	E3
RFPL4	E3
RFPL4A	E3
RFPL4B	E3
RFWD1	E3
RFWD1	E3
RFWD2	E3
RFWD2	E3
RFWD3	E3
RFWD3	E3
RHOBTB1	E3
RHOBTB2	E3
RHOBTB3	E3
RIAZ	E3
RICTOR	E3
RIE2	E3
RINCK	E3
RING1	E3
RING1B	E3
RINZF	E3
RINZFC	E3
RIP	E3
RLGP	E3
RLIM	E3
RMA1	E3
RMA1	E3
RMND5A	E3
RNF	E3
RNF	E3
RNF1	E3
RNF10	E3
RNF100	E3
RNF100	E3
RNF101	E3
RNF102	E3
RNF103	E3
RNF104	E3
RNF104	E3
RNF105	E3
RNF106	E3
RNF107	E3
RNF107	E3
RNF109	E3
RNF11	E3
RNF110	E3
RNF111	E3
RNF113	E3
RNF113A	E3
RNF113B	E3
RNF114	E3
RNF114	E3
RNF115	E3
RNF119	E3
RNF119	E3
RNF12	E3
RNF121	E3
RNF122	E3
RNF123	E3
RNF125	E3
RNF125	E3
RNF126	E3
RNF127	E3
RNF127	E3
RNF128	E3
RNF129	E3
RNF13	E3
RNF130	E3
RNF131	E3
RNF133	E3
RNF134	E3
RNF135	E3
RNF137	E3
RNF137	E3
RNF138	E3
RNF139	E3
RNF14	E3
RNF141	E3
RNF142	E3
RNF144	E3
RNF144A	E3
RNF144B	E3
RNF145	E3
RNF146	E3
RNF147	E3
RNF147	E3
RNF148	E3
RNF149	E3
RNF15	E3
RNF15	E3
RNF150	E3
RNF151	E3
RNF152	E3
RNF153	E3
RNF153	E3
RNF154	E3
RNF155	E3
RNF156	E3
RNF157	E3
RNF158	E3
RNF159	E3
RNF16	E3
RNF16	E3
RNF160	E3
RNF161	E3
RNF164	E3
RNF165	E3
RNF166	E3
RNF166	E3
RNF167	E3
RNF168	E3
RNF170	E3
RNF171	E3
RNF172	E3
RNF173	E3
RNF174	E3
RNF175	E3
RNF176	E3
RNF177	E3
RNF178	E3
RNF179	E3
RNF180	E3
RNF181	E3
RNF182	E3
RNF184	E3
RNF185	E3
RNF186	E3
RNF187	E3
RNF188	E3
RNF189	E3
RNF19	E3
RNF190	E3
RNF191	E3
RNF191	E3
RNF192	E3
RNF196	E3
RNF198	E3
RNF199	E3
RNF19A	E3
RNF19B	E3
RNF2	E3
RNF20	E3
RNF200	E3
RNF200	E3
RNF201	E3
RNF201	E3
RNF202	E3
RNF203	E3
RNF204	E3
RNF206	E3
RNF208	E3
RNF209	E3
RNF21	E3
RNF21	E3
RNF210	E3
RNF211	E3
RNF212	E3
RNF212B	E3
RNF213	E3
RNF215	E3
RNF216	E3
RNF217	E3
RNF218	E3
RNF22	E3
RNF220	E3
RNF222	E3
RNF223	E3
RNF225	E3
RNF23	E3
RNF23	E3
RNF25	E3
RNF26	E3
RNF27	E3
RNF27	E3
RNF28	E3
RNF29	E3
RNF3	E3
RNF30	E3
RNF31	E3
RNF32	E3
RNF33	E3
RNF34	E3
RNF34L	E3
RNF35	E3
RNF35	E3
RNF36	E3
RNF37	E3
RNF37	E3
RNF38	E3
RNF39	E3
RNF39	E3
RNF39	E3
RNF39	E3
RNF3A	E3
RNF4	E3
RNF40	E3
RNF41	E3
RNF41	E3
RNF43	E3
RNF44	E3
RNF45	E3
RNF46	E3
RNF47	E3
RNF48	E3
RNF49	E3
RNF5	E3
RNF5	E3
RNF50	E3
RNF51	E3
RNF52	E3
RNF53	E3
RNF54	E3
RNF55	E3
RNF56	E3
RNF57	E3
RNF58	E3
RNF59	E3
RNF6	E3
RNF60	E3
RNF61	E3
RNF66	E3
RNF68	E3
RNF69	E3
RNF7	E3
RNF70	E3
RNF71	E3
RNF72	E3
RNF73	E3
RNF74	E3
RNF75	E3
RNF76	E3
RNF77	E3
RNF8	E3
RNF80	E3
RNF81	E3
RNF81	E3
RNF82	E3
RNF82	E3
RNF83	E3
RNF84	E3
RNF85	E3
RNF85	E3
RNF86	E3
RNF87	E3
RNF87	E3
RNF88	E3
RNF88	E3
RNF89	E3
RNF89	E3
RNF9	E3
RNF9	E3
RNF90	E3
RNF90	E3
RNF91	E3
RNF92	E3
RNF92	E3
RNF93	E3
RNF93	E3
RNF94	E3
RNF94	E3
RNF95	E3
RNF95	E3
RNF96	E3
RNF96	E3
RNF97	E3
RNF98	E3
RNF99	E3
RNFT1	E3
RNFT2	E3
RNU3IP2	E3
RO52	E3
RO52	E3
ROC1	E3
ROC2	E3
RORET	E3
RORET	E3
RP11-385D13.1	E3
RP11-432B6.3	E3
RP11-432B6.3	E3
RP11-574F21.3	E3
RP1-27O5.3	E3
RP42	E3
RP58	E3
RPTOR	E3
RRP9	E3
RSPRY1	E3
RSUME	E3
RUNXBP2	E3
RWDD3	E3
RZF	E3
SAG	E3
SART1	E3
SAZD	E3
SB1	E3
SB1	E3
SBBI03	E3
SBBI03	E3
SBBI22	E3
SBBIZ1	E3
SCAF11	E3
SCAP	E3
SCCRO	E3
SCCRO3	E3
SEC12	E3
SEC13	E3
SEC13L	E3
SEC13L1	E3
SEC13R	E3
SEC31A	E3
SEC31B	E3
SEC31L2	E3
SEC4L	E3
SEH1	E3
SEH1L	E3
SEL10	E3
SEL10	E3
SEMCAP3	E3
SEMCAP3L	E3
SETMAR	E3
SFP38	E3
SG2NA	E3
SH3BP3	E3
SH3MD2	E3
SH3MD4	E3
SH3RF1	E3
SH3RF2	E3
SH3RF3	E3
SHFM3	E3
SHFM3	E3
SHKBP1	E3
SHKBP1	E3
SHPRH	E3
SIAH1	E3
SIAH2	E3
SKD	E3
SKP1	E3
SKP1A	E3
SKP2	E3
SLX4	E3
SMARCA3	E3
SMCX	E3
SMCY	E3
SMRZ	E3
SMU1	E3
SMURF1	E3
SMURF2	E3
SNEV	E3
SNEV	E3
SNF2L3	E3
SNRNP40	E3
SNURF	E3
SOCS1	E3
SOCS2	E3
SOCS3	E3
SOCS4	E3
SOCS4	E3
SOCS5	E3
SOCS6	E3
SOCS6	E3
SOCS7	E3
SOP2L	E3
SPAG16	E3
SPG	E3
SPG2	E3
SPOP	E3
SPOPL	E3
SPRYD5	E3
SPSB1	E3
SPSB2	E3
SPSB4	E3
SRM	E3
SRYP	E3
SS56	E3
SS56	E3
SSA1	E3
SSA1	E3
SSB1	E3
SSB2	E3
SSB4	E3
SSI1	E3
SSI2	E3
SSI3	E3
SSR3	E3
STAF50	E3
STAF50	E3
STATI2	E3
STATIP1	E3
STC	E3
STC1	E3
STK15	E3
STK6	E3
STRAP	E3
STRN	E3
STRN3	E3
STRN4	E3
STUB1	E3
STXBP5	E3
STXBP5L	E3
SWIP1	E3
[truncated: 2,132 more rows]
